# Supplementary material
Source: PubMed Central journal article supplement (PMC7880902)

# Source Extended Data Fig4: Unprocessed images of western blots

Extended data Fig. 4a

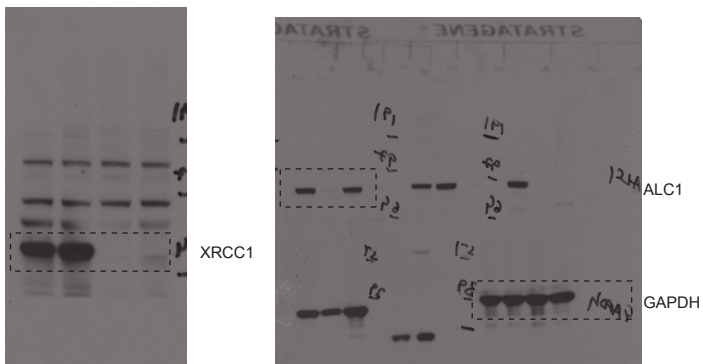

Extended data Fig. 4b

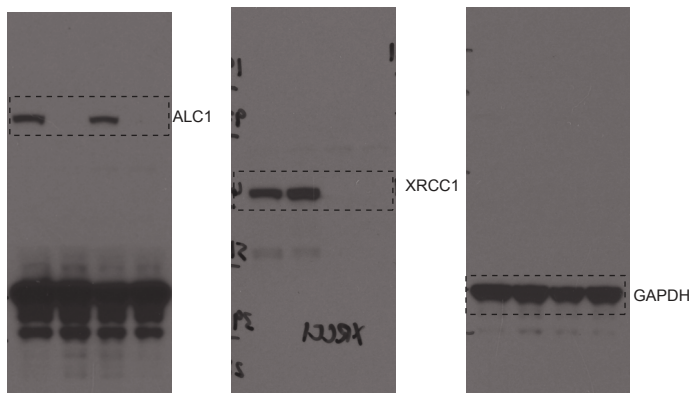

Supplement: NIHMS1653685-supplement-1653685_SourceExtDataFig4a_b.pdf [file NIHMS1653685-supplement-1653685_SourceExtDataFig4a_b.pdf]
