# Supplementary material
Source: PubMed Central journal article supplement (PMC7880902)

# Source Extended Data Fig9: Unprocessed images of western blots

Extended data Fig. 9a

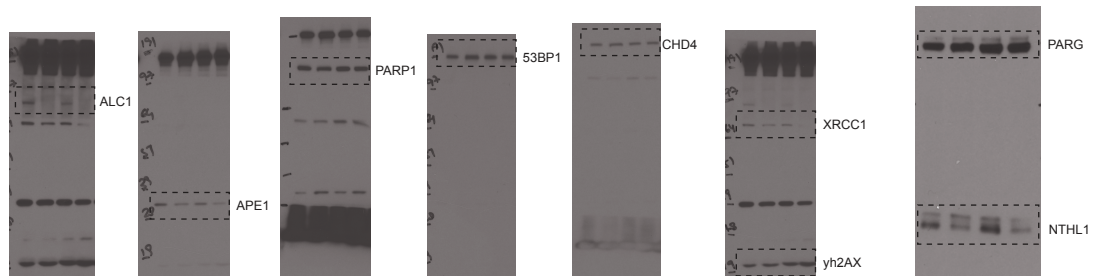

Extended data Fig. 9b

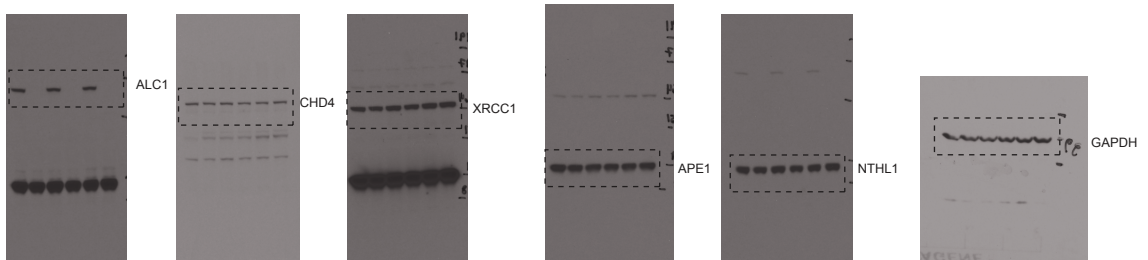

Extended data Fig. 9c

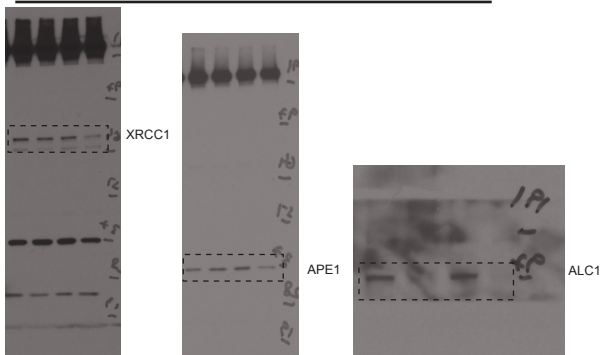

Extended data Fig. 9d

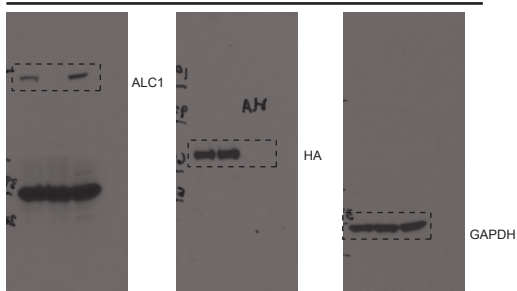

Supplement: NIHMS1653685-supplement-1653685_SourceExtDataFig9a-d.pdf [file NIHMS1653685-supplement-1653685_SourceExtDataFig9a-d.pdf]
