# Supplementary material
Source: PubMed Central journal article supplement (PMC7880902)

## Source Data Figure 2: Unprocessed images of western blots

**Fig. 2c**

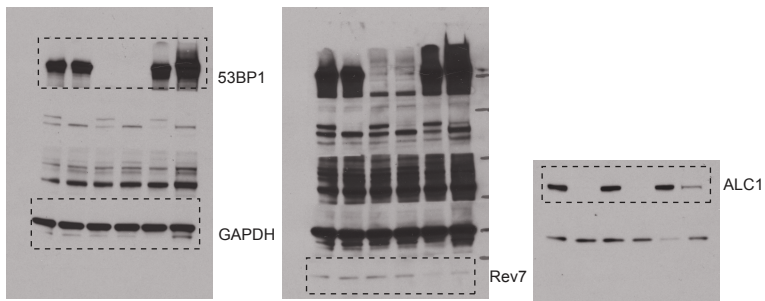

**Fig. 2e**

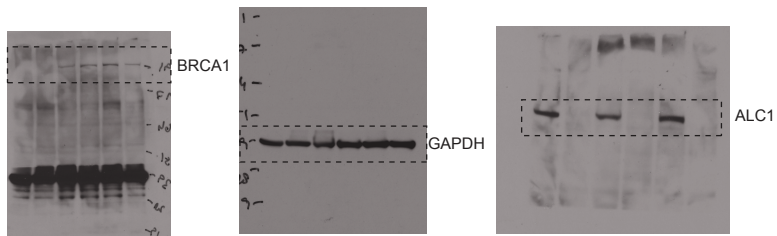

Supplement: NIHMS1653685-supplement-1653685_SourceDataFig2c.pdf [file NIHMS1653685-supplement-1653685_SourceDataFig2c.pdf]

# Source Data Fig3: Unprocessed images of western blots

Fig. 3a

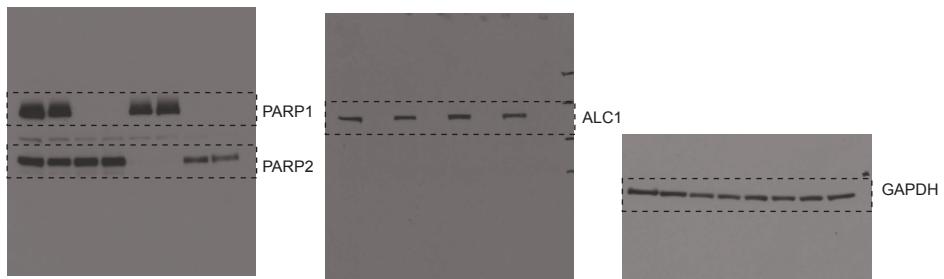

Supplement: NIHMS1653685-supplement-1653685_SourceDataFig3a.pdf [file NIHMS1653685-supplement-1653685_SourceDataFig3a.pdf]

Source Data Fig6: Unprocessed images of western blots

Fig. 6c

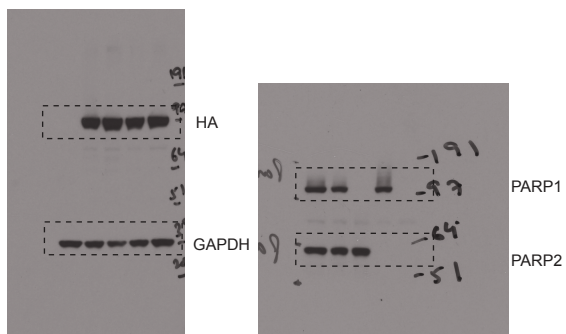

Fig. 6f

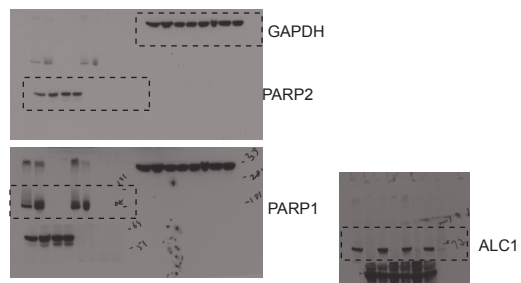

Supplement: NIHMS1653685-supplement-1653685_SourceDataFig6c_6f.pdf [file NIHMS1653685-supplement-1653685_SourceDataFig6c_6f.pdf]

# Source Extended Data Fig1: Unprocessed images of western blots

Extended data Fig. 1b

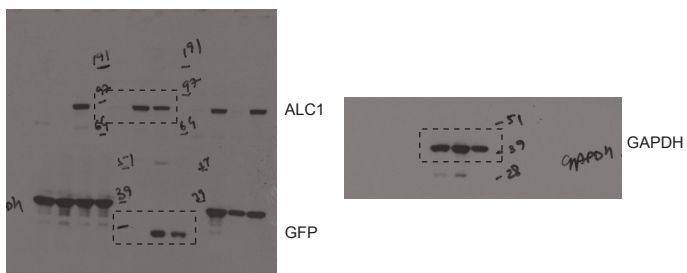

Supplement: NIHMS1653685-supplement-1653685_SourceExtDataFig1b.pdf [file NIHMS1653685-supplement-1653685_SourceExtDataFig1b.pdf]

Source Extended Data Fig3: Unprocessed images of western blots

Extended data Fig. 3b

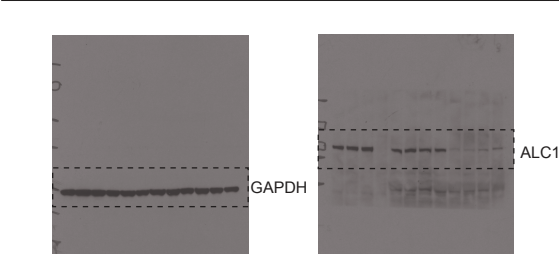

Supplement: NIHMS1653685-supplement-1653685_SourceExtDataFig3b.pdf [file NIHMS1653685-supplement-1653685_SourceExtDataFig3b.pdf]

Source Extended Data Fig8: Unprocessed images of western blots

Extended data Fig. 8d

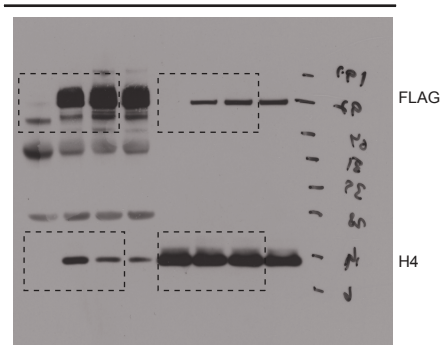

Supplement: NIHMS1653685-supplement-1653685_SourceExtDataFig8d.pdf [file NIHMS1653685-supplement-1653685_SourceExtDataFig8d.pdf]
